# Supplementary material for: TRIM34 modulates influenza virus-activated programmed cell death by targeting Z-DNA-binding protein 1 for K63-linked polyubiquitination
Source: J Biol Chem. 2022 Jan 20;298(3):101611. doi: 10.1016/j.jbc.2022.101611 (PMC8867111; doi:10.1016/j.jbc.2022.101611)
Supplement: Supplemental Figures S1–S4 and Tables S1–S2 [file mmc1.pdf]

1 **Supporting Materials**

2  
3 **TRIM34 modulates influenza virus-activated programmed**  
4 **cell death through targeting ZBP1 for K63-linked**  
5 **polyubiquitination**

6 Xiaoyan Wang<sup>1</sup>, Jing Xiong<sup>1</sup>, Diwei Zhou<sup>2</sup>, Shanfeng Zhang<sup>3</sup>, Li Wang<sup>4</sup>, Qingqing  
7 Tian<sup>5</sup>, Changming Li<sup>1</sup>, Jie Liu<sup>1</sup>, Yaping Wu<sup>6</sup>, Junying Li<sup>7</sup>, Jun Wang<sup>1,\*</sup>

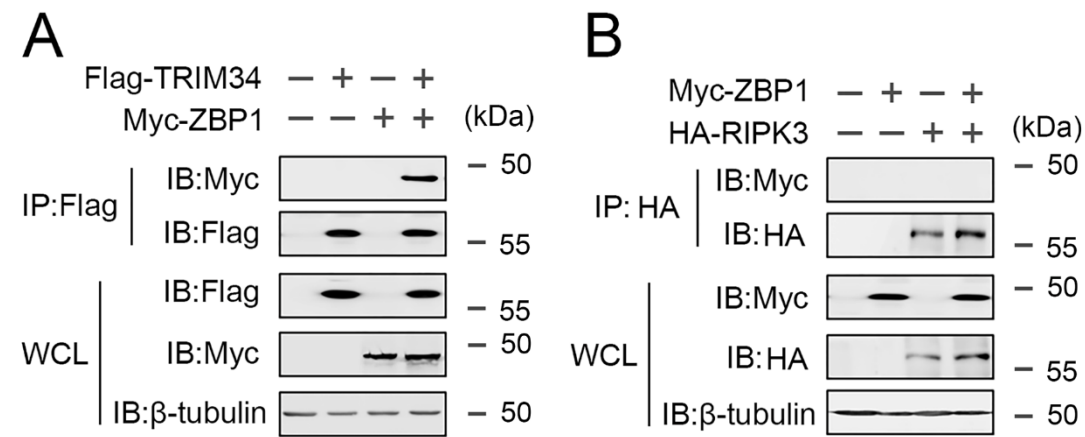

11 **Figure S1, related to Figure 1. TRIM34 interact with ZBP1.**

12 (A) 293T cells were transfected with vector, Myc-ZBP1 and Flag-TRIM34.  
13 Forty-eight hours post-transfection, Co-IP and immunoblot analysis were performed  
14 with the indicated antibodies. (B) Experiments were performed similar to those in (A),  
15 except indicated HA-RIPK3 were used. All experiments were repeated at least three  
16 times.

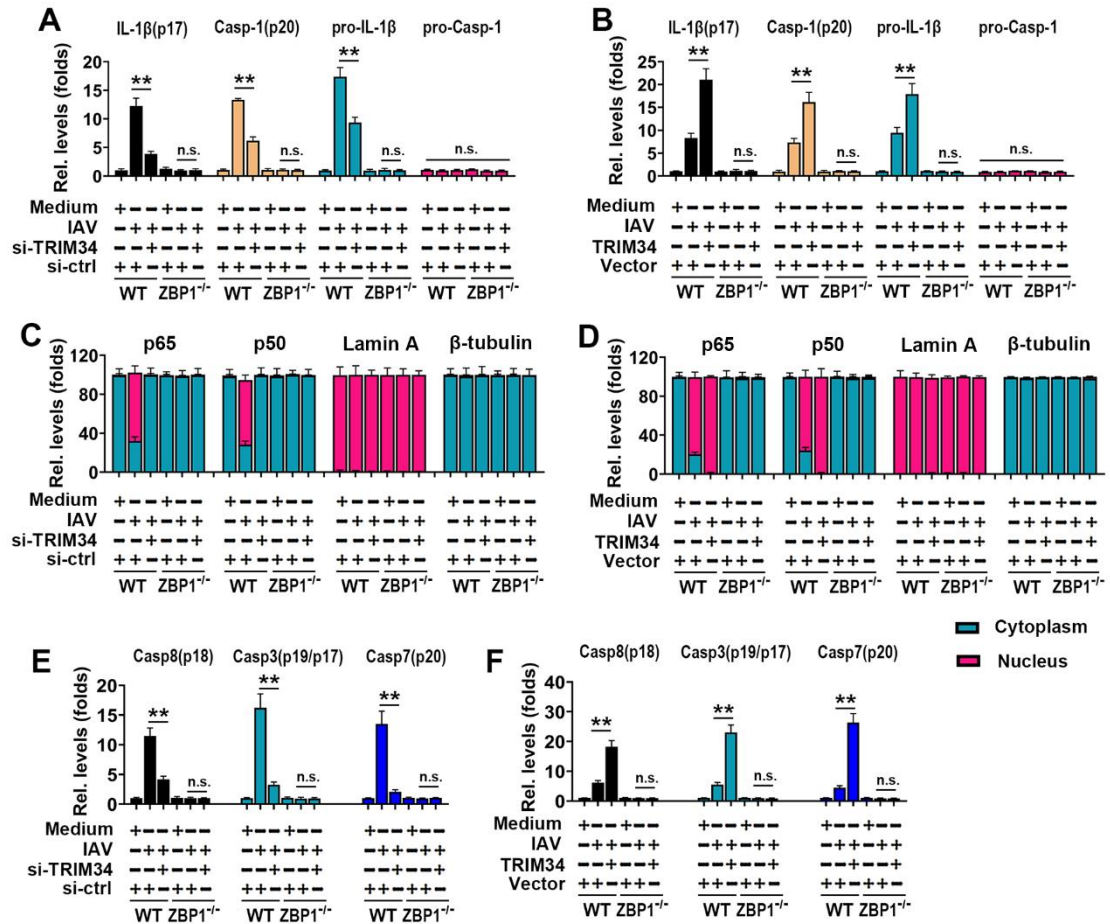

**Figure S2, related to Figure 5. TRIM34 regulates IAV induced NLRP3 inflammasome and programmed cell death pathways via ZBP1 *in vitro*.**

(A and B) The IL-1β (p17)/β-tubulin, Casp-1 (p20)/β-tubulin, pro-IL-1β/β-tubulin and pro-Casp-1/β-tubulin ratios were quantified as described in Fig 5B and 5D.

(C and D) Quantification of p65, p50, Lamin A and β-tubulin cytoplasmic and nuclear localization as described in Fig 5F and 5H.

(E and F) The Casp8 (p18)/Casp8, Casp3 (p19/p17)/Casp3 and Casp7 (p20)/Casp7 ratios were quantified as described in Fig 5J and 5K.

All experiments were repeated at least three times. Bar graphs present means ± SD, n = 3 (\*\*P < 0.01; n.s., not significant).

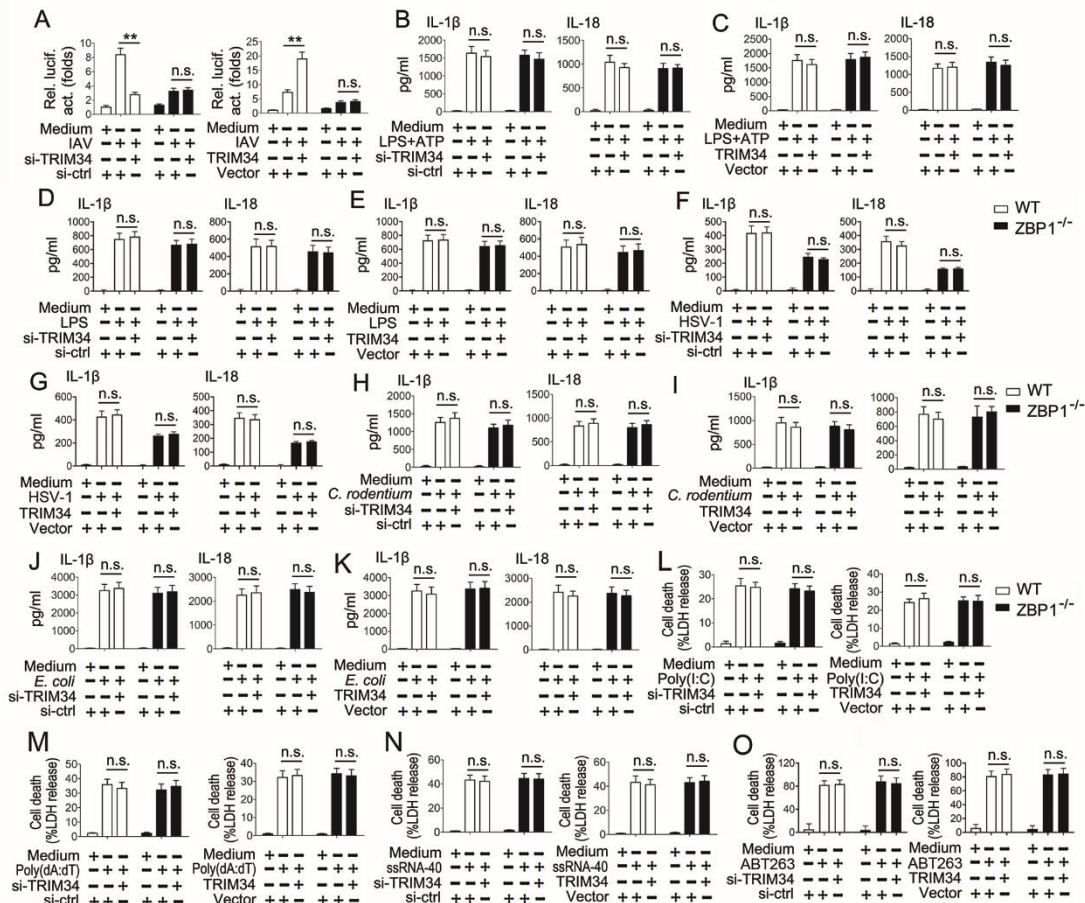

**Figure S3. TRIM34 is dispensable for proinflammatory cytokine production and cell death in response to activation of canonical and non-canonical inflammasomes and transfected RNA ligands.**

(A) THP-1 macrophages were transfected with indicated plasmids, si-RNAs or NF-κB dual luciferase reporter plasmid for 48 h prior to luciferase assays.

(B) THP-1 macrophages were transfected with indicated si-RNAs for 36 h. Then, cells were treated LPS (1 μg/ml for 3 h) and ATP (2.5 mM for 30 min). IL-1β and IL-18 protein levels in cell culture supernatants were determined by ELISA.

(C) Experiments were performed as described in (A), except that cells were transfected with vector control or Flag-TRIM34.

(D-K) Experiments were performed as described in (A), except that cells were treated LPS (1 μg/ml for 6 h) (D and E), infected with HSV-1 (1 MOI for 12 h) (F and G), *C. rodentium* (MOI = 20) (H and I) or *E. coli* (MOI = 20) (J and K) for 20 h.

(L) THP-1 macrophages were transfected with indicated plasmids or si-RNAs for 36 h, and transfected with poly(I:C) (1 μg/ml) for 6 h. Cell death was quantified using LDH release.

(M-O) Experiments were performed as described in (L), except that cell were transfected with poly(dA:dT) (1 μg/ml) for 6 h (M), ssRNA-40 (5 μg/ml) for 24 h (N), or ABT-263 (1 μM) for 72 h (O).

All experiments were repeated at least three times. Bar graphs present means ± SD, n = 3 (\*\*P < 0.01; n.s., not significant).

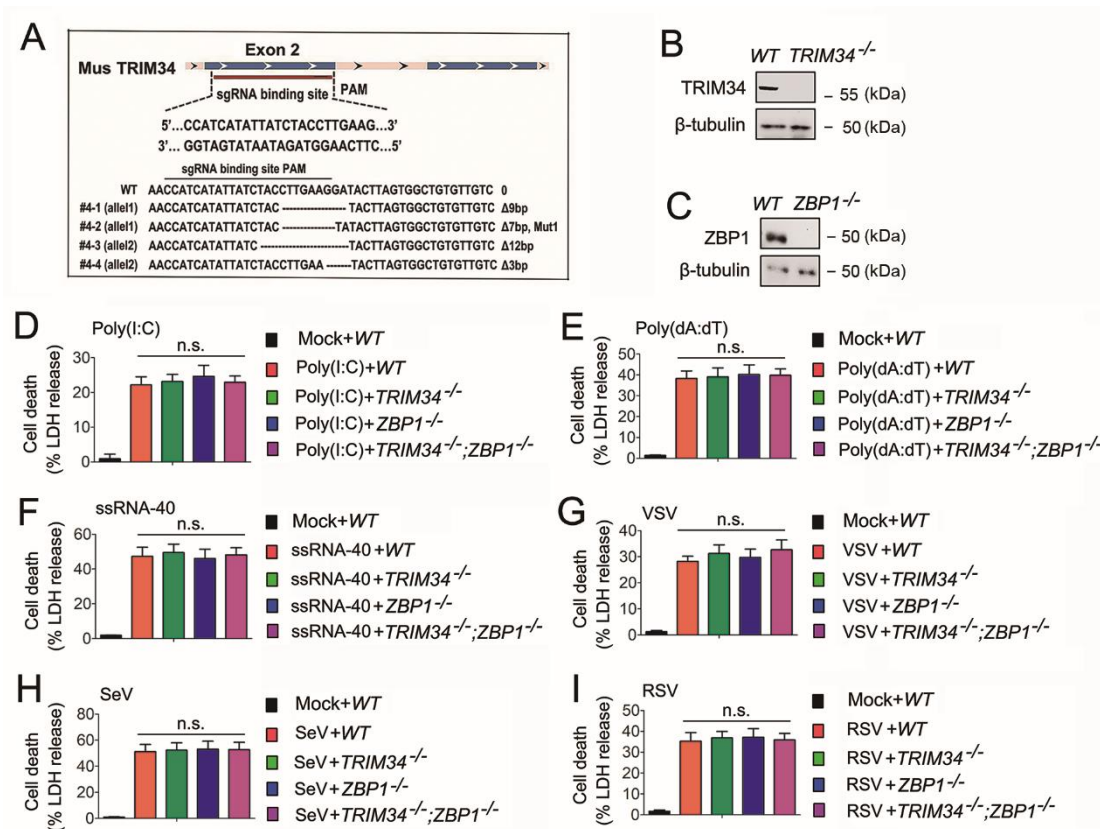

55

**Figure S4. TRIM34 is dispensable for cell death in response to transfected RNA ligands and RNA viruses belonging to Paramyxoviridae and Rhabdoviridae families.**

(A) schematic showing the single guide RNA (sgRNA)-binding site in the mouse *Trim34* gene (top). Sequence of the genomic single guide RNA-binding site (bottom).

(B) *Trim34* expression in the lung of WT and *Trim34*<sup>-/-</sup> mice was detected using Western blot analyses.

(C) *ZBP1* expression in the lung of WT and *ZBP1*<sup>-/-</sup> mice was detected using Western blot analyses.

(D) BMDMs were isolated from indicated mice and transfected with poly(I:C) (1  $\mu$ g/ml) for 6 h. Cell death was quantified using LDH release.

(E and F) Experiments were performed as described in (D), except that cell were transfected with poly(dA:dT) (1  $\mu$ g/ml) for 6 h (E), or ssRNA-40 (5  $\mu$ g/ml) for 24 h (F).

(G) BMDMs were isolated from indicated mice and infected with VSV (MOI=5) for 24 h. Cell death was quantified using LDH release.

(H and I) Experiments were performed as described in (G), except that cell were infected with SeV (MOI = 5) (H), and RSV (MOI = 10) (I) for 24 h.

All experiments were repeated at least three times with consistent results. Bar graphs represent the means  $\pm$  SEM, n = 3 (\*\*P < 0.01; \*P < 0.05).

76

77

78

79

**Table S1 Antibodies used in this study**

| Antibodies       | Source                | Dilution |
|------------------|-----------------------|----------|
| TRIM34           | Abcam (ab180130)      | 1:1000   |
| ZBP1             | Abcam (ab180130)      | 1:2000   |
| HA               | Sigma (H6908)         | 1:2000   |
| Flag             | Sigma (M2)            | 1:2000   |
| Myc              | Abcam (ab32)          | 1:2000   |
| Caspase 3        | Abcam (ab13847)       | 1:5000   |
| Caspase 7        | Abcam (ab 69540)      | 1:5000   |
| Caspase 8        | Abcam (ab32397)       | 1:5000   |
| Caspase 9        | Abcam (ab202068)      | 1:5000   |
| Ubiquitin        | Abcam (ab7780)        | 1:5000   |
| Ubiquitin(k48)   | Abcam (ab140601)      | 1:5000   |
| Ubiquitin(k63)   | Abcam (ab179434)      | 1:1000   |
| Caspase-1        | Abcam (ab138483)      | 1:5000   |
| IL-1 $\beta$     | Abcam (ab200478)      | 1:500    |
| p65              | Cell Signaling (8242) | 1:2000   |
| p50              | Cell Signaling (3035) | 1:2000   |
| $\beta$ -actin   | Abcam (ab179467)      | 1:5000   |
| $\beta$ -tubulin | Abcam (ab210797)      | 1:5000   |
| Lamin A          | Abcam (ab26300)       | 1:2000   |

80

81

82

**Table S2 Primers used in qRT-PCR**

| Gene name                       | 5'primer                         | 3'primer                        |
|---------------------------------|----------------------------------|---------------------------------|
| <b>ZBP1</b>                     | 5'- CAGGAGTAGATGACAGGGAGTTGC -3' | 5'- CAGGTAGCCATGATGGAAGGTAA -3' |
| <b>IL-6</b>                     | 5'- ACTCACCTCTTCAGAACGAATTG -3'  | 5'-AGCCATCTTTGGAAGGTTTCAG-3'    |
| <b>IL-1<math>\beta</math></b>   | 5'- TGGCAATGAGGATGACTTGTTTC -3'  | 5'- GCTGTAGTGGTGGTCGGAGATT -3'  |
| <b>TNF-<math>\alpha</math></b>  | 5'- CCCTGGTATGAGCCCATCTATC -3'   | 5'- CTTAGTGGTTGCCAGCACTTCA -3'  |
| <b><math>\beta</math>-actin</b> | 5'- GGACTTCGAGCAAGAGATGG-3'      | 5'-AGGAAGGAAGGCTGGAAGAG-3'      |

83

84

85

86

87
